# Supplementary material for: Development of prediction model for cloud point of thermo-responsive polymers by experiment-oriented materials informatics
Source: Royal Society of Chemistry journal article supplement (doi:10.1039/d3py00314k), 2023-01-01
Supplement: d3py00314k1.pdf [file d3py00314k1.pdf]

† Electronic Supplementary Information (ESI)

## Development of prediction model for cloud point of thermo-responsive polymers by experiment-oriented materials informatics

*Mai Hayakawa,<sup>a</sup> Kosuke Sakano,<sup>a</sup> Rei Kumada,<sup>a</sup> Haruka Tobita,<sup>a</sup>  
Yasuhiko Igarashi,<sup>b</sup> Daniel Citterio,<sup>a</sup> Yuya Oaki,<sup>a</sup> and Yuki Hiruta<sup>\*a</sup>*

<sup>a</sup> Department of Applied Chemistry, Faculty of Science and Technology, Keio University  
3-14-1 Hiyoshi, Kohoku-ku, Yokohama 223-8522, Japan.

<sup>b</sup> Faculty of Engineering, Information and Systems, University of Tsukuba  
1-1-1 Tennodai, Tsukuba 305-8573, Japan.

\*To whom correspondence should be addressed.

Email: [hiruta@applc.keio.ac.jp](mailto:hiruta@applc.keio.ac.jp)

Table S1 Dataset with training data.<sup>1-5</sup>

| No. | $x_1$ [g mol <sup>-1</sup> ] | $x_2$ [-] | $x_3$ [mg mL <sup>-1</sup> ] | $x_4$ [-] | $x_5$ [-] | $x_6$ [-] | $x_7$ [g mol <sup>-1</sup> ] | $x_8$ [K] | $x_9$ [cm <sup>3</sup> mol <sup>-1</sup> ] | $x_{10}$ [-] | $x_{11}$ [-] | $x_{12}$ [-] | $y$ [°C] | Ref. |
|-----|------------------------------|-----------|------------------------------|-----------|-----------|-----------|------------------------------|-----------|--------------------------------------------|--------------|--------------|--------------|----------|------|
| 1   | 6500                         | 2.1       | 5                            | 16.97     | 10.795    | 7.21      | 119.1655                     | 470.283   | 35.6725                                    | 30.415       | 0.30676      | 3.57339      | 23.3     | 1    |
| 2   | 6400                         | 2.1       | 5                            | 17.04     | 10.69     | 7.22      | 125.171                      | 482.536   | 37.215                                     | 31.73        | 0.35852      | 3.73158      | 14.8     | 1    |
| 3   | 5900                         | 1.8       | 5                            | 17.015    | 10.875    | 7.255     | 121.117                      | 435.1285  | 36.2365                                    | 31.0165      | 0.30626      | 3.624765     | 21.7     | 1    |
| 4   | 20100                        | 1.9       | 5                            | 16.9      | 10.9      | 7.2       | 113.16                       | 458.03    | 34.13                                      | 29.1         | 0.255        | 3.4152       | 32.1     | 2    |
| 5   | 17200                        | 2.9       | 5                            | 16.984    | 10.825    | 7.197     | 118.2651                     | 468.8462  | 35.5706                                    | 29.889       | 0.321276     | 3.560754     | 25.8     | 2    |
| 6   | 6300                         | 1.25      | 1                            | 17.4      | 6.6       | 5.7       | 125.17                       | 447.71    | 35.67                                      | 20.31        | 0.927        | 3.6256       | 64       | 3    |
| 7   | 29000                        | 1.54      | 1                            | 17.2      | 5.4       | 4.7       | 139.2                        | 470.83    | 40.22                                      | 20.31        | 1.446        | 4.0894       | 41       | 3    |
| 8   | 6700                         | 1.75      | 1                            | 17.2      | 5.8       | 5.1       | 139.2                        | 470.59    | 40.27                                      | 20.31        | 1.456        | 4.0894       | 25       | 3    |
| 9   | 15000                        | 2.43      | 1                            | 17.3      | 6.4       | 5.4       | 169.22                       | 515.89    | 46.4                                       | 29.54        | 0.773        | 4.7063       | 64       | 3    |
| 10  | 6100                         | 2.66      | 1                            | 17.1      | 6         | 5         | 183.25                       | 538.77    | 51.2                                       | 29.54        | 1.162        | 5.1701       | 36       | 3    |
| 11  | 11000                        | 1.99      | 1                            | 17.7      | 6.7       | 5.9       | 211.26                       | 608.41    | 55.29                                      | 38.77        | 0.654        | 5.6096       | 47.5     | 3    |
| 12  | 11000                        | 1.53      | 1                            | 17.375    | 6.55      | 5.625     | 146.705                      | 481.915   | 41.8025                                    | 22.6175      | 1.28525      | 4.243625     | 34.5     | 3    |
| 13  | 16000                        | 1.69      | 1                            | 17.35     | 6.5       | 5.55      | 154.21                       | 493.24    | 43.335                                     | 24.925       | 1.1145       | 4.39785      | 41.3     | 3    |
| 14  | 13000                        | 1.35      | 1                            | 17.325    | 6.45      | 5.475     | 161.715                      | 504.565   | 44.8675                                    | 27.2325      | 0.94375      | 4.552075     | 51       | 3    |
| 15  | 15000                        | 1.9       | 1                            | 17.415    | 6.605     | 5.71      | 142.803                      | 477.481   | 41.021                                     | 21.233       | 1.4159       | 4.16541      | 27.7     | 3    |
| 16  | 16000                        | 1.89      | 1                            | 17.475    | 6.625     | 5.75      | 157.215                      | 505.045   | 44.025                                     | 24.925       | 1.2555       | 4.46945      | 30.5     | 3    |
| 17  | 16000                        | 2.07      | 1                            | 17.55     | 6.65      | 5.8       | 175.23                       | 539.5     | 47.78                                      | 29.54        | 1.055        | 4.8495       | 32.4     | 3    |
| 18  | 12000                        | 1.7       | 1                            | 17.45     | 6.69      | 5.73      | 142.001                      | 476.247   | 40.684                                     | 21.563       | 1.344        | 4.13335      | 32       | 3    |
| 19  | 14000                        | 1.77      | 1                            | 17.525    | 6.825     | 5.775     | 146.2025                     | 484.7325  | 41.305                                     | 23.4425      | 1.176        | 4.199275     | 39.7     | 3    |
| 20  | 15000                        | 1.7       | 1                            | 17.65     | 7.05      | 5.85      | 153.205                      | 498.875   | 42.34                                      | 26.575       | 0.896        | 4.30915      | 60.6     | 3    |
| 21  | 7100                         | 2.5       | 5                            | 16.9      | 10.9      | 7.2       | 113.16                       | 458.03    | 34.13                                      | 29.1         | 0.255        | 3.4152       | 32       | 4    |
| 22  | 17500                        | 2.6       | 5                            | 16.873    | 10.684    | 7.131     | 114.0312                     | 457.4117  | 34.3274                                    | 29.016       | 0.32814      | 3.43656      | 26.9     | 4    |
| 23  | 8200                         | 1.89      | 5                            | 16.898    | 10.864    | 7.188     | 114.302                      | 459.658   | 34.4742                                    | 29.1648      | 0.26         | 3.450402     | 37.3     | 4    |
| 24  | 5500                         | 1.15      | 1                            | 16.6      | 9.6       | 6.2       | 183.21                       | 537.74    | 48.21                                      | 46.61        | 0.622        | 4.818        | 15       | 5    |
| 25  | 8300                         | 1.25      | 1                            | 16.625    | 9.64      | 6.27      | 179.006                      | 529.7025  | 47.28                                      | 45.295       | 0.58255      | 4.72467      | 24.5     | 5    |
| 26  | 6800                         | 1.22      | 1                            | 16.65     | 9.68      | 6.34      | 174.802                      | 521.665   | 46.35                                      | 43.98        | 0.5431       | 4.63134      | 30.5     | 5    |
| 27  | 6200                         | 1.25      | 1                            | 16.7      | 9.76      | 6.48      | 166.394                      | 505.59    | 44.49                                      | 41.35        | 0.4642       | 4.44468      | 34.5     | 5    |
| 28  | 7000                         | 1.28      | 1                            | 16.75     | 9.84      | 6.62      | 157.986                      | 489.515   | 42.63                                      | 38.72        | 0.3853       | 4.25802      | 43.5     | 5    |

|                                                                                     |                                                                                     |                                                                                      |                                                                                       |
|-------------------------------------------------------------------------------------|-------------------------------------------------------------------------------------|--------------------------------------------------------------------------------------|---------------------------------------------------------------------------------------|
| 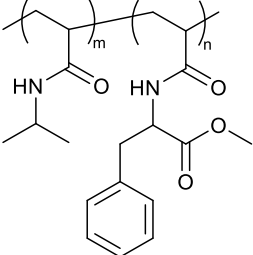   |    |    |    |
| <b>No.</b> <b>m : n</b> <b>T<sub>CP</sub> [°C]</b>                                  | <b>No.</b> <b>m : n</b> <b>T<sub>CP</sub> [°C]</b>                                  | <b>No.</b> <b>m : n</b> <b>T<sub>CP</sub> [°C]</b>                                   | <b>No.</b> <b>m : n</b> <b>T<sub>CP</sub> [°C]</b>                                    |
| 1      95 : 5      23.3                                                             | 3      95 : 5      21.7                                                             | 4      0 : 100      32.1                                                             | 5      97 : 3      25.8                                                               |
| 2      90 : 10      14.8                                                            |                                                                                     |                                                                                      |                                                                                       |
|    |    |    |    |
| <b>No.</b> <b>m : n</b> <b>T<sub>CP</sub> [°C]</b>                                  | <b>No.</b> <b>m : n</b> <b>T<sub>CP</sub> [°C]</b>                                  | <b>No.</b> <b>m : n</b> <b>T<sub>CP</sub> [°C]</b>                                   | <b>No.</b> <b>m : n</b> <b>T<sub>CP</sub> [°C]</b>                                    |
| 6      0 : 100      64                                                              | 7      0 : 100      41                                                              | 8      0 : 100      25                                                               | 9      0 : 100      64                                                                |
|   |   |   |   |
| <b>No.</b> <b>m : n</b> <b>T<sub>CP</sub> [°C]</b>                                  | <b>No.</b> <b>m : n</b> <b>T<sub>CP</sub> [°C]</b>                                  | <b>No.</b> <b>m : n</b> <b>T<sub>CP</sub> [°C]</b>                                   | <b>No.</b> <b>m : n</b> <b>T<sub>CP</sub> [°C]</b>                                    |
| 10     0 : 100      36                                                              | 11     0 : 100      47.5                                                            | 12     75 : 25      34.5                                                             | 15     95 : 5      27.7                                                               |
|                                                                                     |                                                                                     | 13     50 : 50      41.3                                                             | 16     75 : 25      30.5                                                              |
|                                                                                     |                                                                                     | 14     25 : 75      51                                                               | 17     50 : 50      32.4                                                              |
|  |  |  |  |
| <b>No.</b> <b>m : n</b> <b>T<sub>CP</sub> [°C]</b>                                  | <b>No.</b> <b>m : n</b> <b>T<sub>CP</sub> [°C]</b>                                  | <b>No.</b> <b>m : n</b> <b>T<sub>CP</sub> [°C]</b>                                   | <b>No.</b> <b>m : n</b> <b>T<sub>CP</sub> [°C]</b>                                    |
| 18     90 : 10      32.0                                                            | 21     100 : 0      32                                                              | 23     98 : 2      37.3                                                              | 24     0 : 100      15                                                                |
| 19     75 : 25      39.7                                                            | 22     97 : 3      26.9                                                             |                                                                                      | 25     5 : 95      24.5                                                               |
| 20     50 : 50      60.6                                                            |                                                                                     |                                                                                      | 26     10 : 90      30.5                                                              |
|                                                                                     |                                                                                     |                                                                                      | 27     20 : 80      34.5                                                              |
|                                                                                     |                                                                                     |                                                                                      | 28     30 : 70      43.5                                                              |

Fig. S1 The chemical structures and cloud points of polymers included in dataset.<sup>1-5</sup>

Table S2 The composition ratio of monomers from literature references used for training data. Monomers (compounds) are shown in Scheme 1.

| No. | Monomers<br>(Compounds) |    | Composition ratio<br>[mol %] | Ref. |
|-----|-------------------------|----|------------------------------|------|
| 1   | 1                       | 2  | 95 : 5                       | 1    |
| 2   | 1                       | 2  | 90 : 10                      | 1    |
| 3   | 1                       | 3  | 95 : 5                       | 1    |
| 4   | 1                       | -  | 100 : 0                      | 2    |
| 5   | 1                       | 4  | 97 : 3                       | 2    |
| 6   | 5                       | -  | 100 : 0                      | 3    |
| 7   | 6                       | -  | 100 : 0                      | 3    |
| 8   | 7                       | -  | 100 : 0                      | 3    |
| 9   | 8                       | -  | 100 : 0                      | 3    |
| 10  | 9                       | -  | 100 : 0                      | 3    |
| 11  | 10                      | -  | 100 : 0                      | 3    |
| 12  | 7                       | 8  | 75 : 25                      | 3    |
| 13  | 7                       | 8  | 50 : 50                      | 3    |
| 14  | 7                       | 8  | 25 : 75                      | 3    |
| 15  | 7                       | 10 | 95 : 5                       | 3    |
| 16  | 7                       | 10 | 75 : 25                      | 3    |
| 17  | 7                       | 10 | 50 : 50                      | 3    |
| 18  | 7                       | 11 | 90 : 10                      | 3    |
| 19  | 7                       | 11 | 75 : 25                      | 3    |
| 20  | 7                       | 11 | 50 : 50                      | 3    |
| 21  | 1                       | -  | 100 : 0                      | 4    |
| 22  | 1                       | 12 | 97 : 3                       | 4    |
| 23  | 1                       | 13 | 98 : 2                       | 4    |
| 24  | 14                      | 15 | 0 : 100                      | 5    |
| 25  | 14                      | 15 | 5 : 95                       | 5    |
| 26  | 14                      | 15 | 10 : 90                      | 5    |
| 27  | 14                      | 15 | 20 : 80                      | 5    |
| 28  | 14                      | 15 | 30 : 70                      | 5    |

$^1\text{H}$  NMR spectrum of P(NIPAAm<sub>90</sub>-*co*-DMAAm<sub>10</sub>) in CD<sub>3</sub>OD

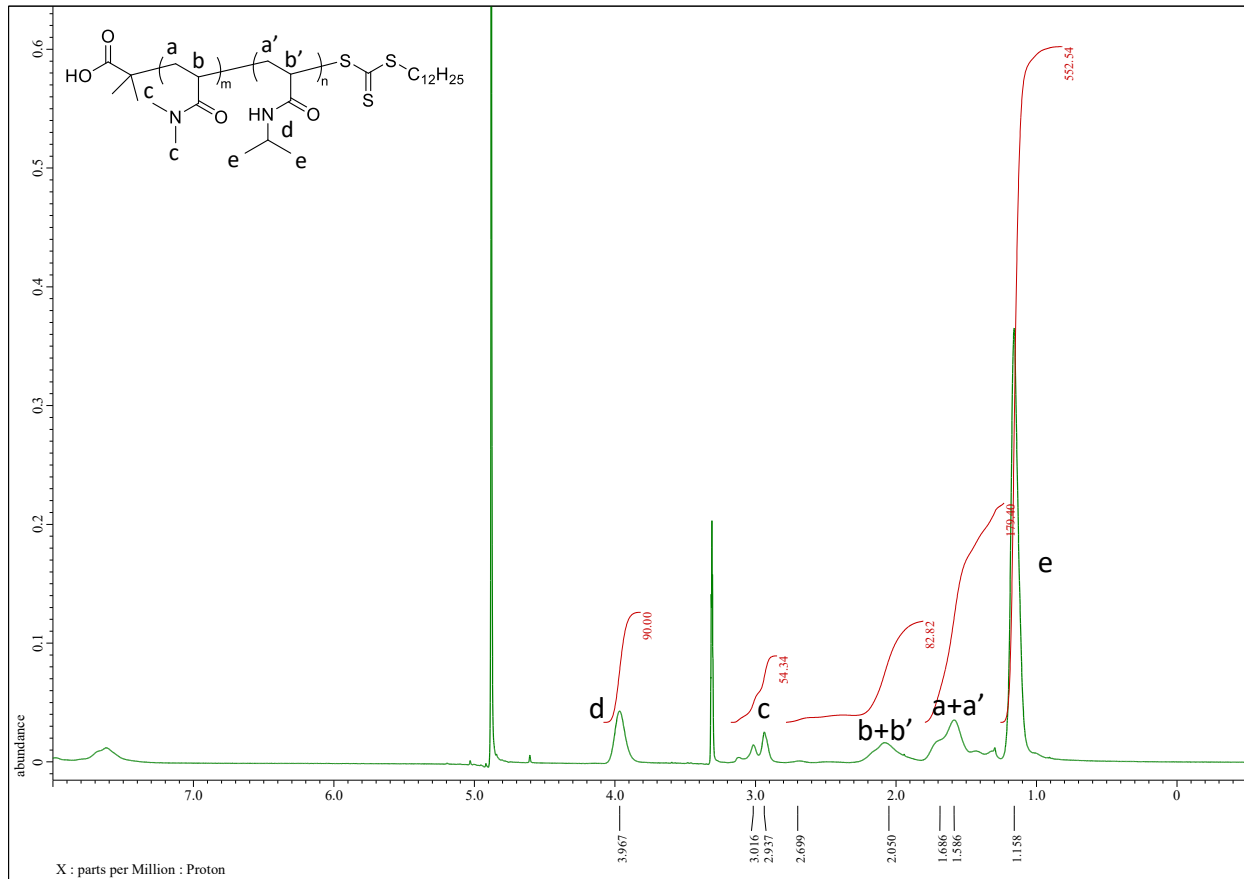

$^1\text{H}$  NMR spectrum of P(NIPAAm<sub>70</sub>-*co*-DMAAm<sub>30</sub>) in CD<sub>3</sub>OD

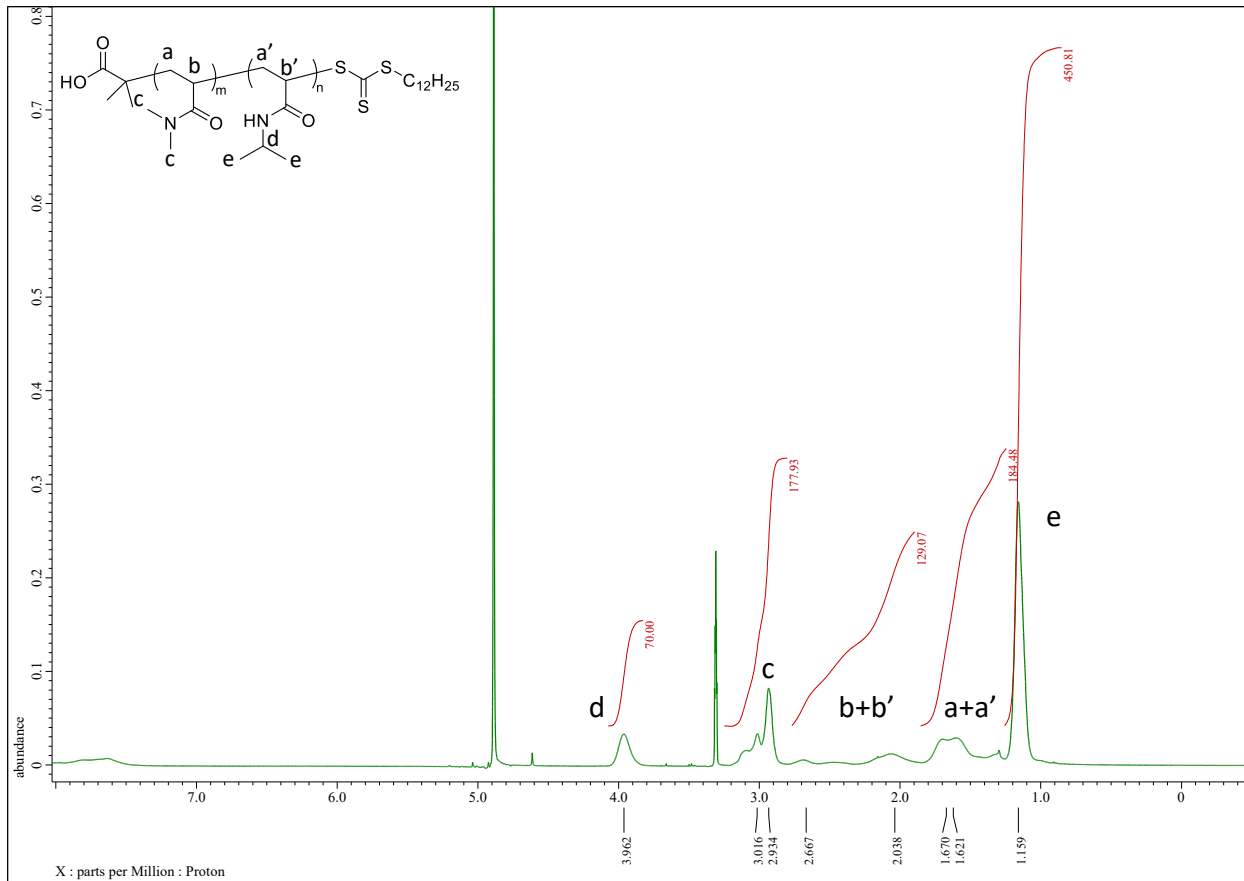

$^1\text{H}$  NMR spectrum of P(NIPAAm<sub>50</sub>-*co*-DMAAm<sub>50</sub>) in CD<sub>3</sub>OD

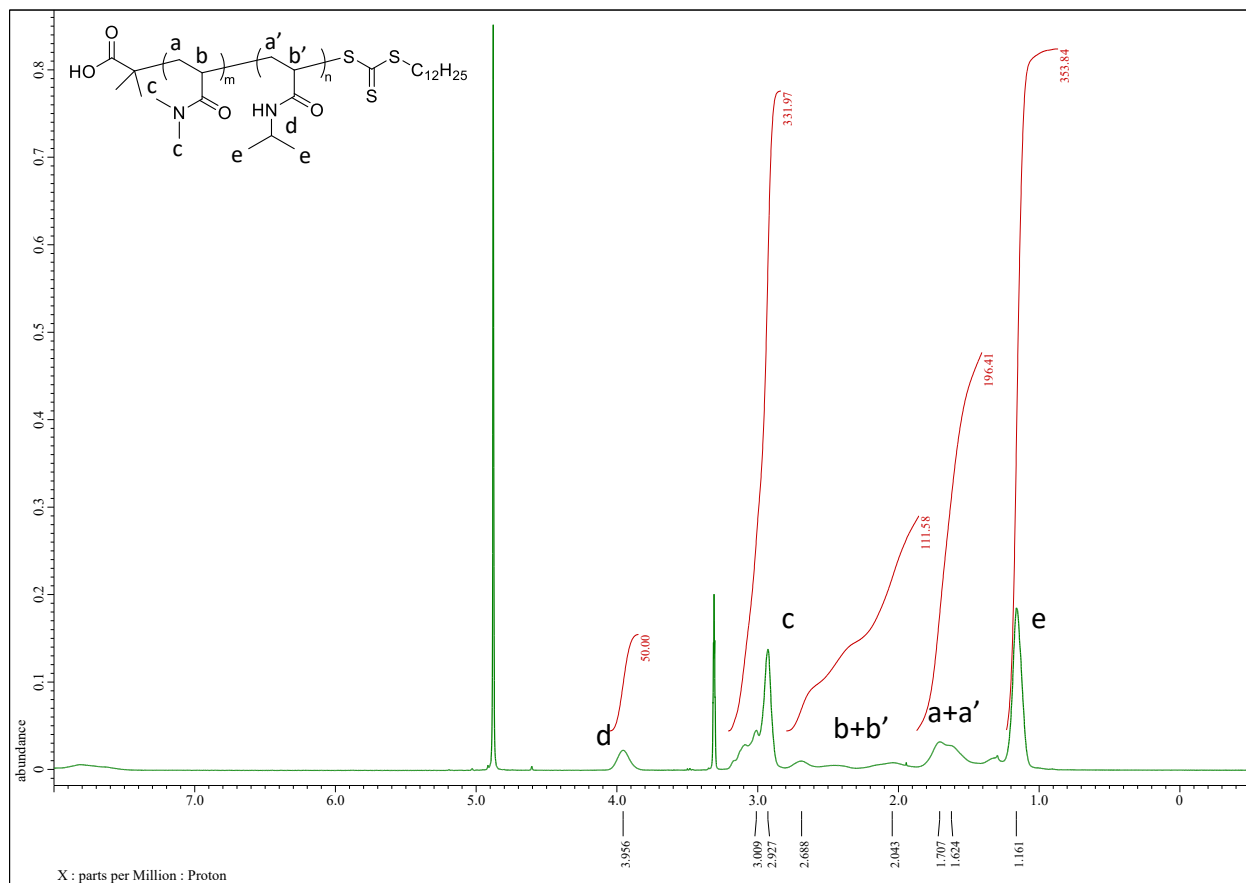

$^1\text{H}$  NMR spectrum of P(NIPAAm<sub>90</sub>-*co*-NNPAAm<sub>10</sub>) in CDCl<sub>3</sub>

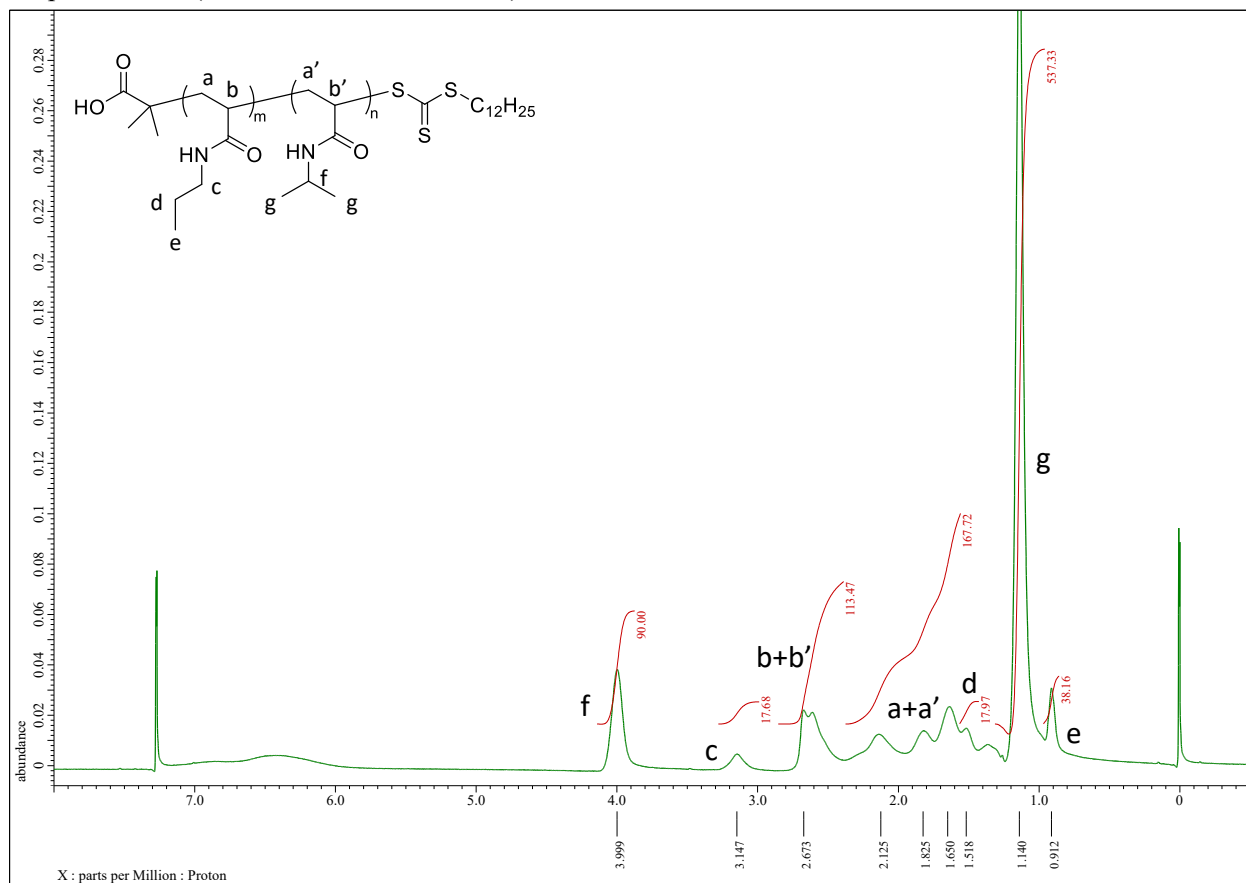



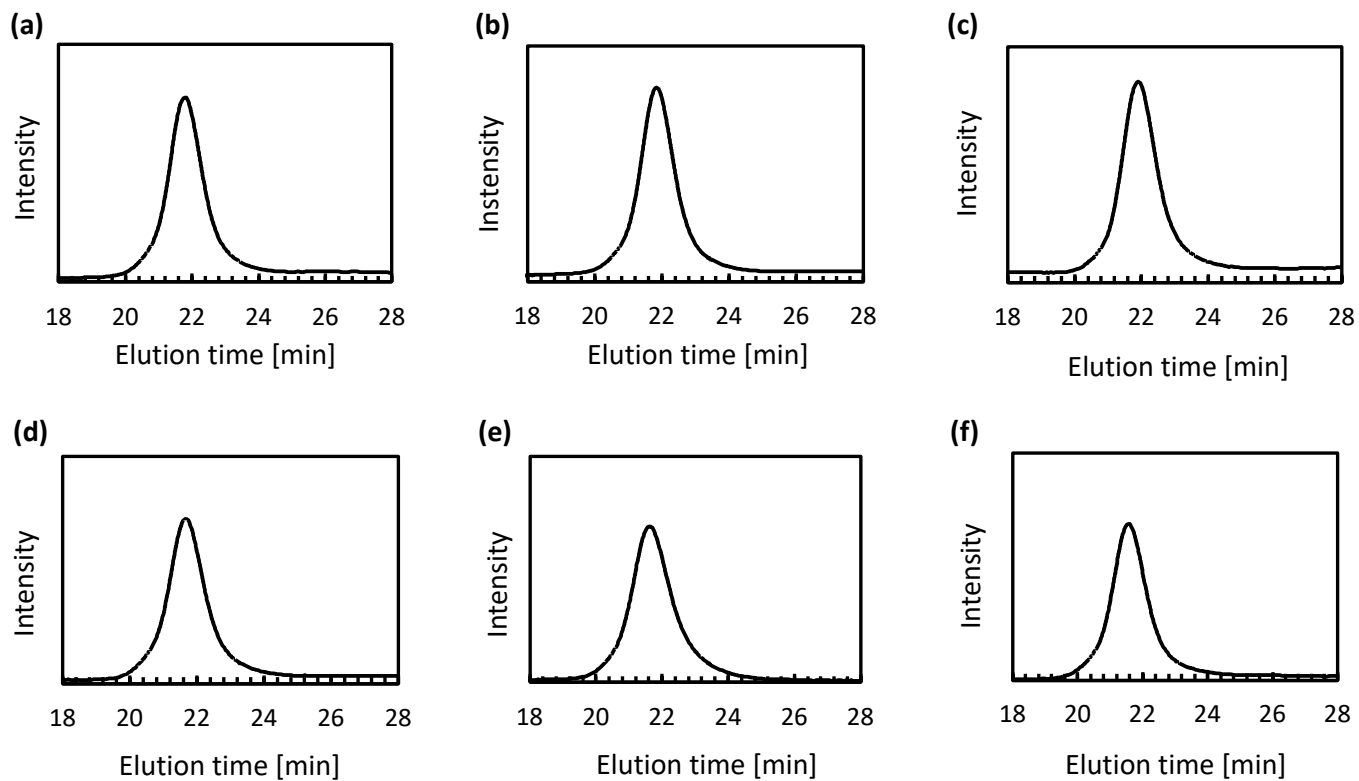

Fig. S2 GPC elution curves for (a) P(NIPAAm<sub>90</sub>-co-DMAAm<sub>10</sub>), (b) P(NIPAAm<sub>70</sub>-co-DMAAm<sub>30</sub>), (c) P(NIPAAm<sub>50</sub>-co-DMAAm<sub>50</sub>), (d) P(NIPAAm<sub>90</sub>-co-NNPAAm<sub>10</sub>), (e) P(NIPAAm<sub>70</sub>-co-NNPAAm<sub>30</sub>), (f) P(NIPAAm<sub>50</sub>-co-NNPAAm<sub>50</sub>)

Table S3 Dataset with test data from literature references.<sup>4,6</sup>

| No. | $x_3$ [mg mL <sup>-1</sup> ] | $x_5$ [-] | $x_{11}$ [-] | $y$ [°C] | Ref. |
|-----|------------------------------|-----------|--------------|----------|------|
| 29  | 5                            | 10.828    | 0.27938      | 31       | 4    |
| 30  | 5                            | 10.756    | 0.30376      | 30.2     | 4    |
| 31  | 5                            | 10.882    | 0.2575       | 34.8     | 4    |
| 32  | 5                            | 10.846    | 0.2625       | 41.4     | 4    |
| 33  | 5                            | 10.828    | 0.265        | 43.8     | 4    |
| 34  | 5                            | 9.6       | 0.622        | 20.7     | 6    |
| 35  | 5                            | 10.25     | 0.4385       | 24       | 6    |



Table S4 The composition of test data from articles. Monomers (compounds) are shown in Scheme 1.

| No. | Monomers<br>(Compounds) |    | Composition ratio<br>[mol %] | Ref. |
|-----|-------------------------|----|------------------------------|------|
| 29  | 1                       | 12 | 99 : 1                       | 4    |
| 30  | 1                       | 12 | 98 : 2                       | 4    |
| 31  | 1                       | 13 | 99 : 1                       | 4    |
| 32  | 1                       | 13 | 97 : 3                       | 4    |
| 33  | 1                       | 13 | 96 : 4                       | 4    |
| 34  | 15                      | -  | 100 : 0                      | 6    |
| 35  | 1                       | 15 | 50 : 50                      | 6    |

Table S5 Test dataset of synthesized polymers

| Polymer                                           | $x_3$ [mg mL <sup>-1</sup> ] | $x_5$ [-] | $x_{11}$ [-] | $y$ [°C] |
|---------------------------------------------------|------------------------------|-----------|--------------|----------|
| P(NIPAAm <sub>90-co</sub> -DMAAm <sub>10</sub> )  | 5                            | 10.85     | 0.2128       | 35.4     |
| P(NIPAAm <sub>70-co</sub> -DMAAm <sub>30</sub> )  | 5                            | 10.75     | 0.1284       | 44.7     |
| P(NIPAAm <sub>50-co</sub> -DMAAm <sub>50</sub> )  | 5                            | 10.65     | 0.044        | 64.0     |
| P(NIPAAm <sub>90-co</sub> -NNPAAm <sub>10</sub> ) | 5                            | 10.91     | 0.277        | 31.7     |
| P(NIPAAm <sub>70-co</sub> -NNPAAm <sub>30</sub> ) | 5                            | 10.93     | 0.321        | 29.2     |
| P(NIPAAm <sub>50-co</sub> -NNPAAm <sub>50</sub> ) | 5                            | 10.95     | 0.365        | 27.1     |

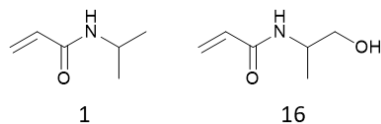

Fig. S3 The structure of monomers from literature references for correcting coefficients of the prediction model.<sup>7</sup>

Table S6 Dataset for correcting coefficients of the prediction model, containing additional data from references (No. 36-40).

| No. | $x_3$ [mg mL <sup>-1</sup> ] | $x_5$ [-] | $x_{11}$ [-] | $y$ [°C] | Ref. |
|-----|------------------------------|-----------|--------------|----------|------|
| 1   | 5                            | 10.795    | 0.30676      | 23.3     | 1    |
| 2   | 5                            | 10.69     | 0.35852      | 14.8     | 1    |
| 3   | 5                            | 10.875    | 0.30626      | 21.7     | 1    |
| 4   | 5                            | 10.9      | 0.255        | 32.1     | 2    |
| 5   | 5                            | 10.825    | 0.321276     | 25.8     | 2    |
| 6   | 1                            | 6.6       | 0.927        | 64       | 3    |
| 7   | 1                            | 5.4       | 1.446        | 41       | 3    |
| 8   | 1                            | 5.8       | 1.456        | 25       | 3    |
| 9   | 1                            | 6.4       | 0.773        | 64       | 3    |
| 10  | 1                            | 6         | 1.162        | 36       | 3    |
| 11  | 1                            | 6.7       | 0.654        | 47.5     | 3    |
| 12  | 1                            | 6.55      | 1.28525      | 34.5     | 3    |
| 13  | 1                            | 6.5       | 1.1145       | 41.3     | 3    |
| 14  | 1                            | 6.45      | 0.94375      | 51       | 3    |
| 15  | 1                            | 6.605     | 1.4159       | 32       | 3    |
| 16  | 1                            | 6.625     | 1.2555       | 39.7     | 3    |
| 17  | 1                            | 6.65      | 1.055        | 60.6     | 3    |
| 18  | 1                            | 6.69      | 1.344        | 32       | 3    |
| 19  | 1                            | 6.825     | 1.176        | 39.7     | 3    |
| 20  | 1                            | 7.05      | 0.896        | 60.6     | 3    |
| 21  | 5                            | 10.9      | 0.255        | 32       | 4    |
| 22  | 5                            | 10.684    | 0.32814      | 26.9     | 4    |
| 23  | 5                            | 10.864    | 0.26         | 37.3     | 4    |
| 24  | 1                            | 9.6       | 0.622        | 15       | 5    |
| 25  | 1                            | 9.64      | 0.58255      | 24.5     | 5    |
| 26  | 1                            | 9.68      | 0.5431       | 30.5     | 5    |
| 27  | 1                            | 9.76      | 0.4642       | 34.5     | 5    |
| 28  | 1                            | 9.84      | 0.3853       | 43.5     | 5    |
| 36  | 5                            | 10.9      | 0.255        | 31.6     | 7    |
| 37  | 5                            | 11.15     | 0.1577       | 36.7     | 7    |
| 38  | 5                            | 11.65     | -0.0369      | 41.8     | 7    |
| 39  | 5                            | 12.15     | -0.2315      | 55       | 7    |
| 40  | 5                            | 12.9      | -0.5234      | 80       | 7    |

Table S7 The composition of additional test data from literature references. Monomers (compounds) are shown in Fig. S2.

| No. | Monomers<br>(Compounds) |    | Composition ratio<br>[mol %] | Ref. |
|-----|-------------------------|----|------------------------------|------|
| 36  | 1                       | 16 | 100 : 0                      | 7    |
| 37  | 1                       | 16 | 90 : 10                      | 7    |
| 38  | 1                       | 16 | 70 : 30                      | 7    |
| 39  | 1                       | 16 | 50 : 50                      | 7    |
| 40  | 1                       | 16 | 20 : 80                      | 7    |

## References

- 1 Y. Hiruta, R. Kanazashi, E. Ayano, T. Okano and H. Kanazawa, *The Analyst*, 2016, **141**, 910–917.
- 2 T. Nishio, R. Kanazashi, A. Nojima, H. Kanazawa and T. Okano, *J. Chromatogr. A.*, 2012, **1228**, 148–154.
- 3 G.-T. Chen, C.-H. Wang, J.-G. Zhang, Y. Wang, R. Zhang, F.-S. Du, N. Yan, Y. Kou and Z.-C. Li, *Macromolecules*, 2010, **43**, 9972–9981.
- 4 Y. Hiruta, M. Shimamura, M. Matsuura, Y. Maekawa, T. Funatsu, Y. Suzuki, E. Ayano, T. Okano and H. Kanazawa, *ACS Macro Lett.*, 2014, **3**, 281–285.
- 5 H. Mori, H. Iwaya, A. Nagai and T. Endo, *Chem. Commun.*, 2005, 4872.
- 6 H. Kanazawa, E. Ayano, C. Sakamoto, R. Yoda, A. Kikuchi and T. Okano, *J. Chromatogr. A*, 2006, **1106**, 152–158.
- 7 T. Maeda, K. Yamamoto and T. Aoyagi, *J. Colloid Interface Sci.*, 2006, **302**, 467–474.
